# Supplementary material for: Dual-loaded, long-term sustained drug releasing and thixotropic hydrogel for localized chemotherapy of cancer
Source: Royal Society of Chemistry journal article supplement (doi:10.1039/c9bm00540d), 2019-01-01
Supplement: c9bm00540d1.pdf [file c9bm00540d1.pdf]

Electronic Supplementary Information (ESI) for Biomaterials Science.

**Supplementary Information**

**Dual-loaded, Long-term Sustained Drug Releasing and  
Thixotropic Hydrogel for Localized Chemotherapy of Cancer**

*Han Cao<sup>a,#</sup>, Yu Duan<sup>a,#</sup>, Qinrui Lin<sup>a,b</sup>, Yuhong Yang<sup>b,\*</sup>, Zuguang Gong<sup>a</sup>, Yiming  
Zhong<sup>c</sup>, Xin Chen<sup>a</sup>, Zhengzhong Shao<sup>a,\*</sup>*

<sup>a</sup> State Key Laboratory of Molecular Engineering of Polymers, Department of  
Macromolecular Science, Laboratory of Advanced Materials, Fudan University,  
Shanghai, 200438, People's Republic of China

<sup>b</sup> Research Center for Analysis and Measurement, Fudan University  
Shanghai, People's Republic of China

<sup>c</sup> Fuels and Energy Technology Institute & Department of Chemical Engineering,  
Curtin University, Perth, Australia

<sup>#</sup> H. Cao and Y. Duan contributed equally to this work.

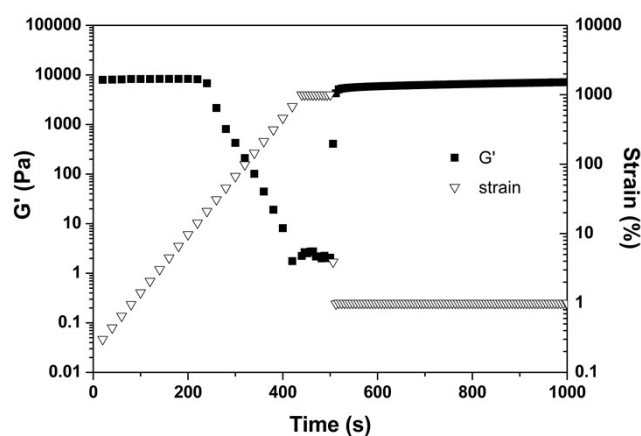

**Figure S1.**  $G'$  and  $G''$  of RSF/HPC hydrogel on strain sweep (0.3-1000%) and subsequent step strain (1000% and 1%) measurements.

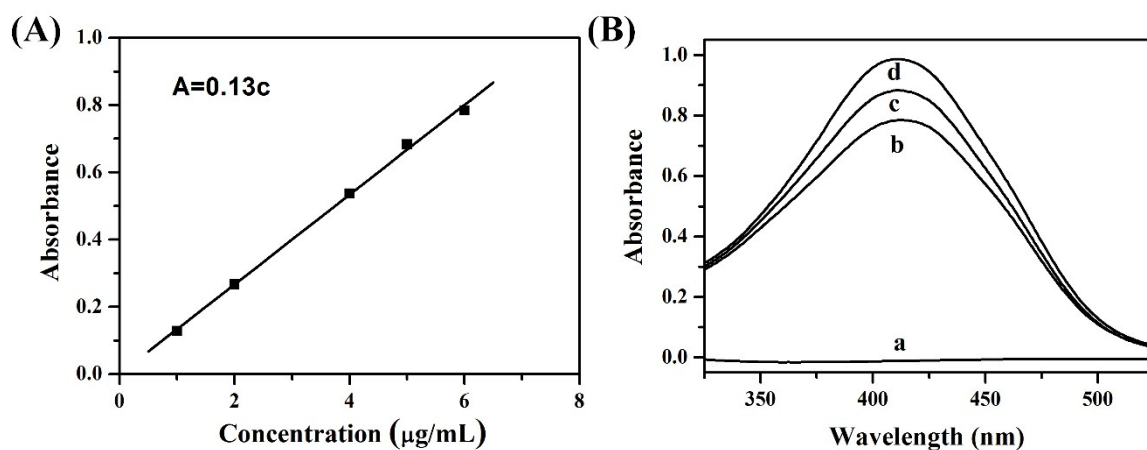

**Figure S2.** (A) Standard curve of Cur in Cur-RSF. (B) UV-Vis absorbance curves of 10% RSF solution (a), saturated solution of Cur in 5% RSF solution (b), 8% RSF solution (c) and 10% RSF solution (d). All samples were 250-fold diluted by DI water before testing.

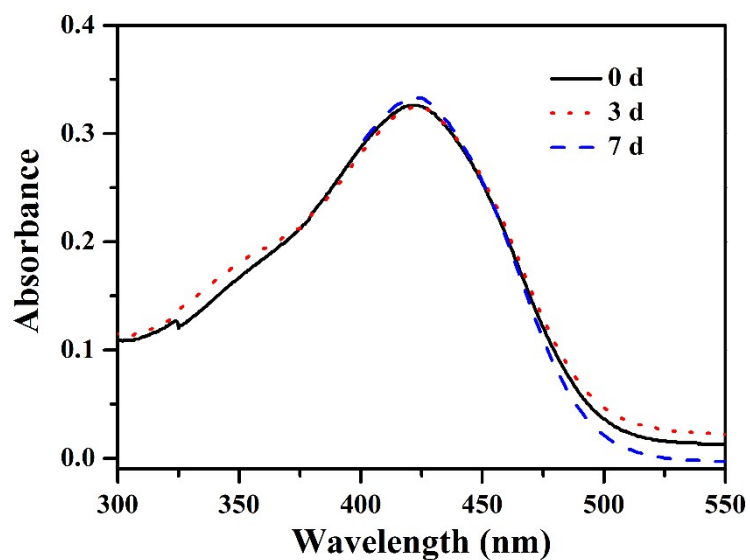

**Figure S3.** UV-Vis spectra of 1.5 mg/mL Cur in 5% RSF solution over time. Samples were 250-fold diluted by DI water before testing.

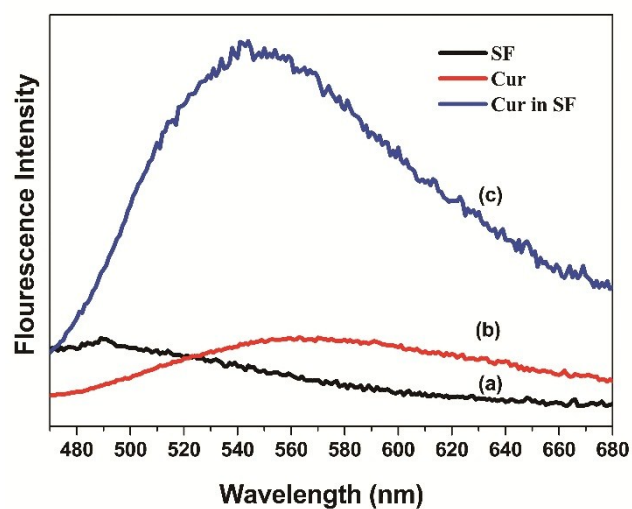

**Figure S4.** Fluorescence spectra of (a) 5% RSF solution, (b) Cur aqueous solution and (c) 5% RSF solution containing 1.5 mg/mL Cur.

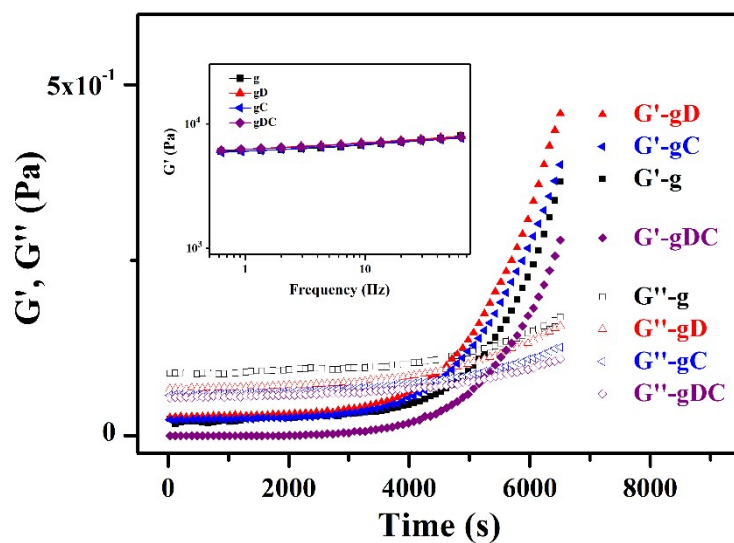

**Figure S5.** Storage modulus ( $G'$ , filled symbols) and loss modulus ( $G''$ , open symbols) versus time for g, gD, gC and gDC. Inset: Storage modules ( $G'$ ) versus frequency for g, gD, gC and gDC.

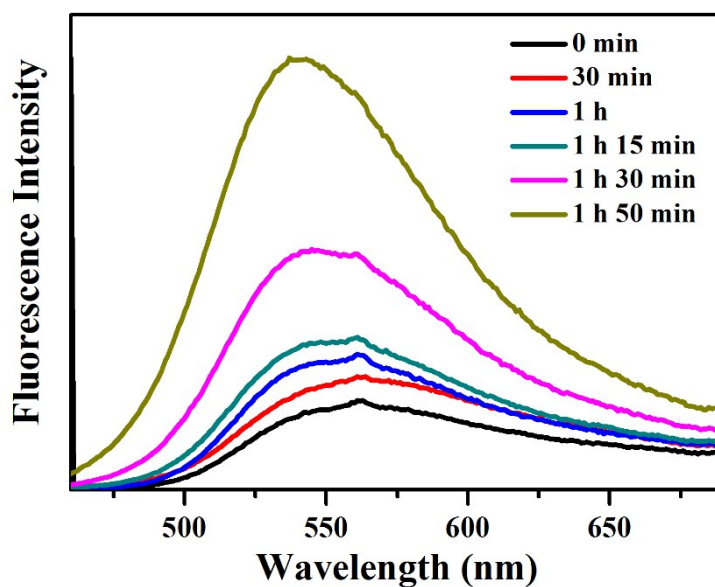

**Figure S6.** Fluorescence spectra of the mixture of curcumin and RSF/HPC solution with solid content of 5% and incubated at 37 °C with different time.

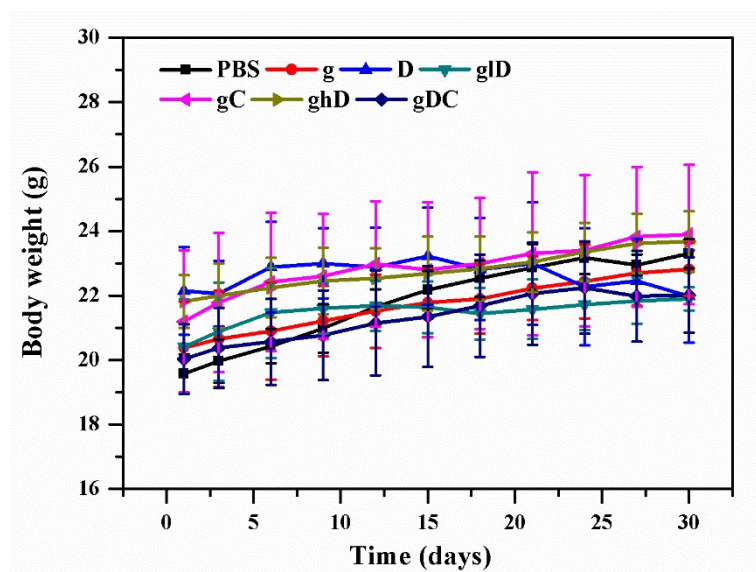

**Figure S7.** Changes in body weight of HepG2 tumor-bearing mice after intratumoral injection.

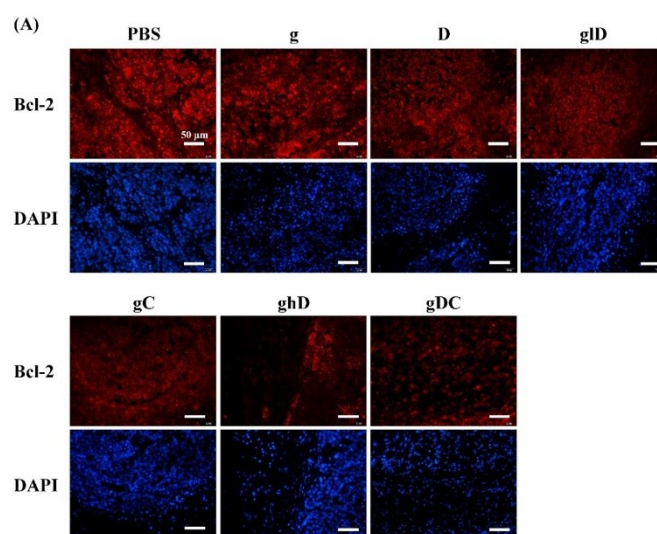

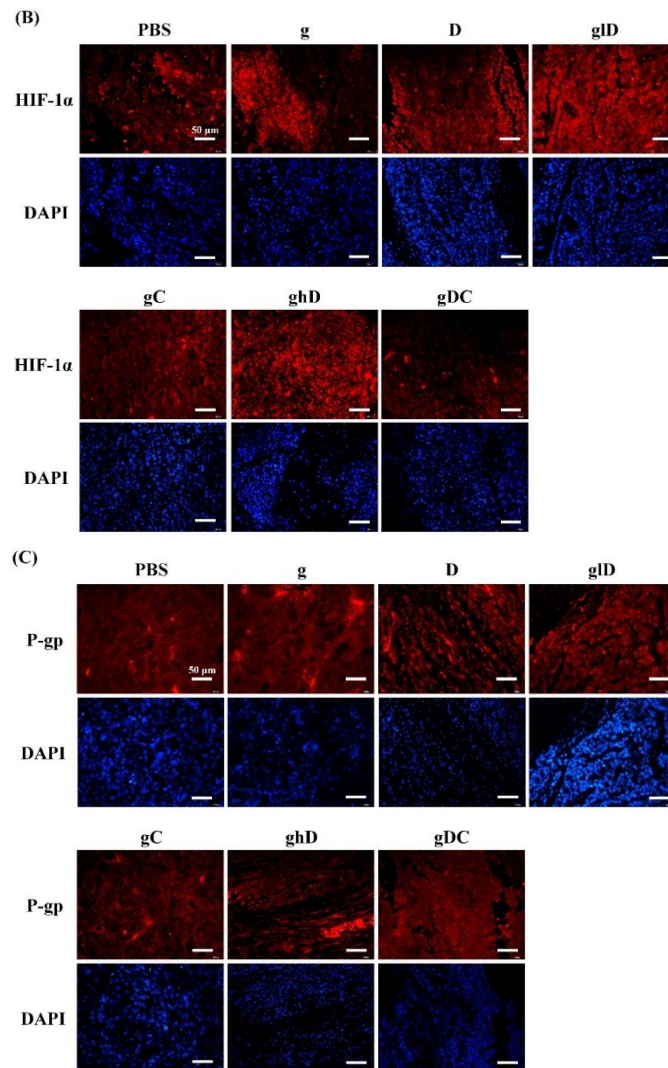

**Figure S8.** Expression of (A) Bcl-2, (B) HIF-1 $\alpha$  and (C) P-gp by immunohistochemistry (red fluorescence). Cell nuclei are stained by DAPI (blue fluorescence). Scale bar: 50  $\mu$ m.
